# Supplementary material for: Neutralization and Stability of SARS-CoV-2 Omicron Variant
Source: bioRxiv or medRxiv preprint supplement (doi:10.1101/2021.12.16.472934), 2021-12-20
Supplement: Supplementary file [file media-1.pdf]

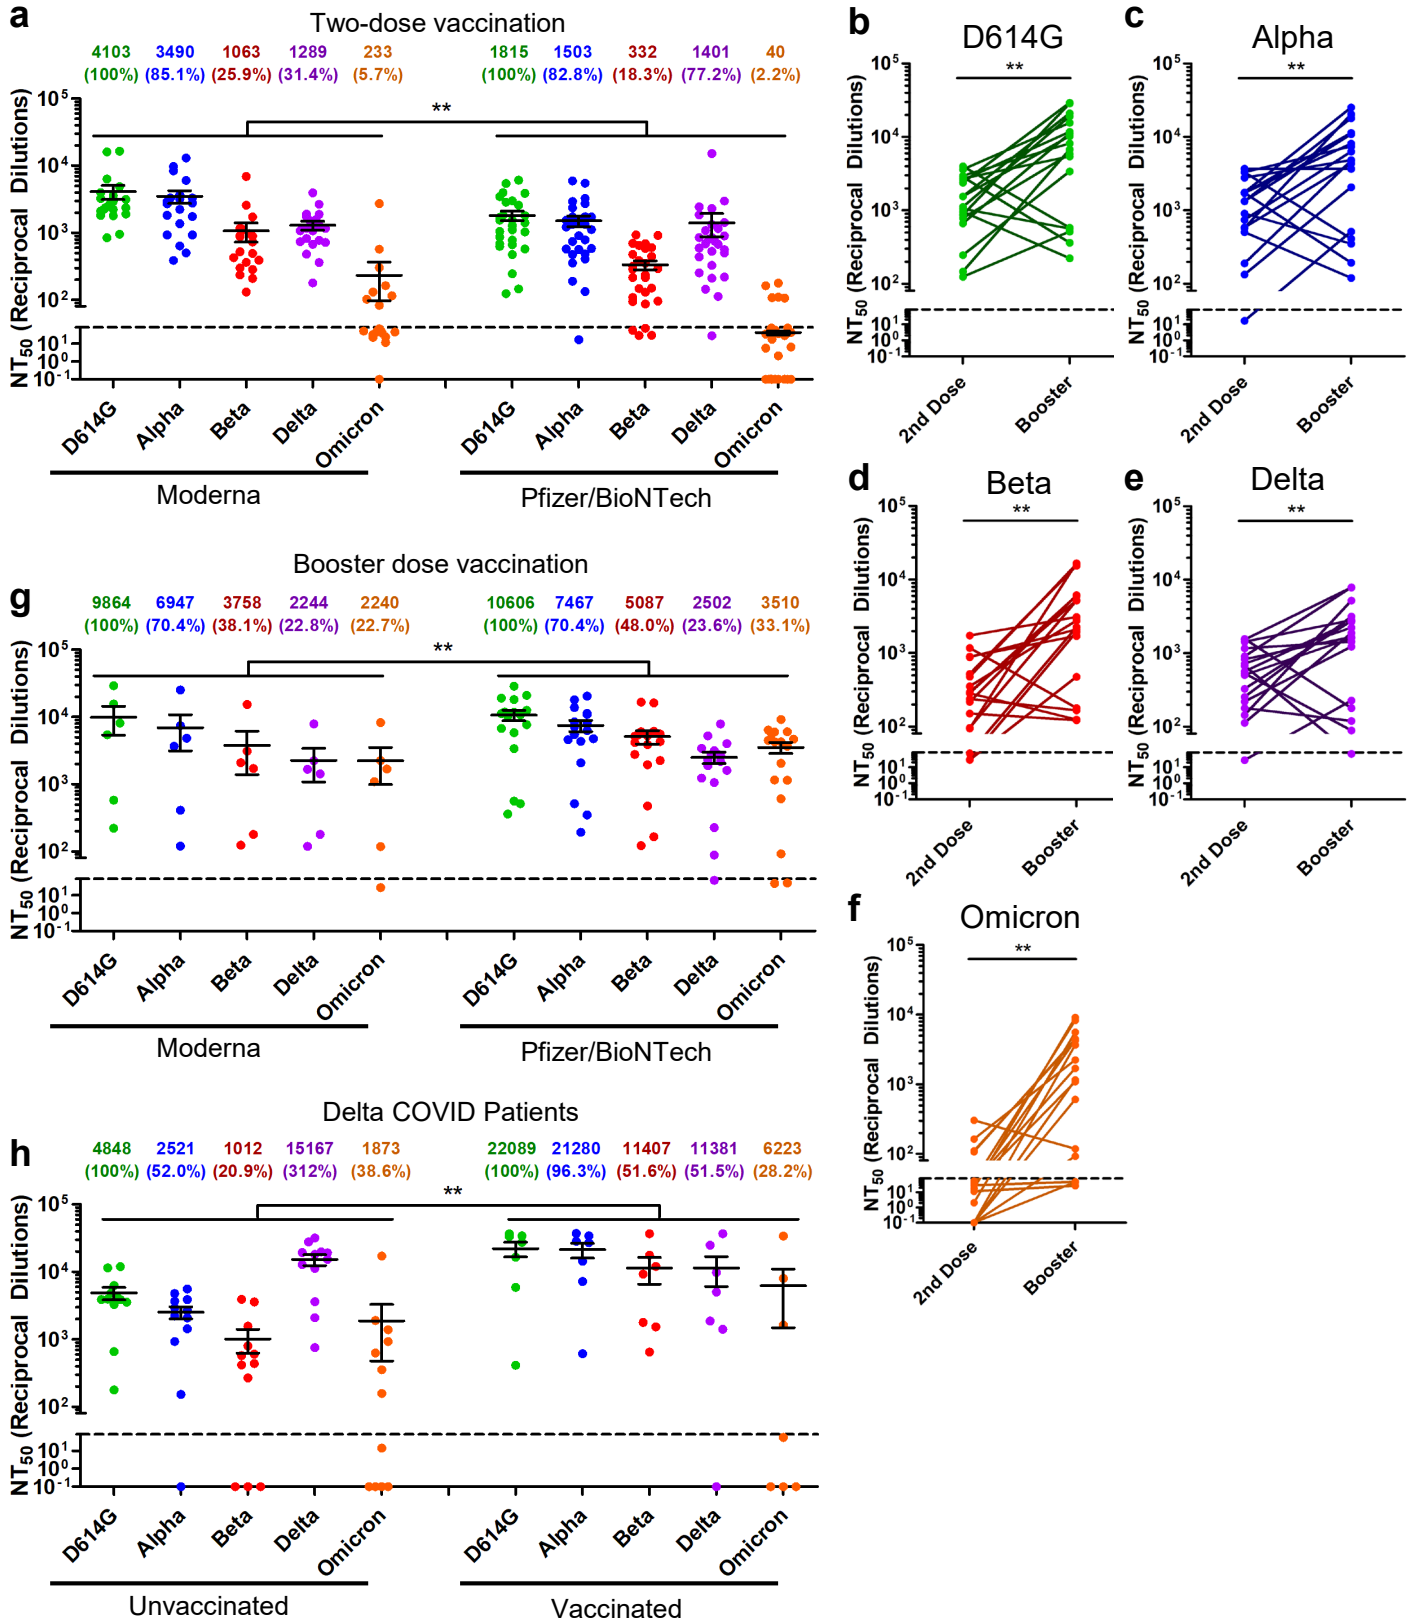

**Figure S1. Neutralization of SARS-CoV-2 Omicron variant by vaccination status and vaccine type.** (a)  $NT_{50}$  values for HCWs who received two doses of Moderna mRNA-1273 ( $n = 20$ ) or Pfizer/BioNTech BNT162b2 ( $n = 28$ ) are plotted by vaccine type. (b)  $NT_{50}$  values for recipients of Moderna mRNA-1273 ( $n = 6$ ) or Pfizer/BioNTech BNT162b2 ( $n = 17$ ) booster doses are plotted by vaccine type. (c-g) Post second vaccine dose and post booster dose  $NT_{50}$  values are plotted pairwise for HCWs for which both time points were analyzed ( $n = 18$ ) against the D614G (c), Alpha (d), Beta (e), Delta (f), and Omicron (g) variants. (h)  $NT_{50}$  values for unvaccinated ( $n = 12$ ) and vaccinated ( $n = 7$ ) Delta-wave COVID-19 ICU-patients are plotted according to vaccination status. Bars in panels a, b and h represent means  $\pm$  standard error and statistical significance in all cases was determined by two-tailed t-test with Welch's correction. Dashed lines indicate the threshold  $NT_{50}$ , which was set to 80. P-values are represented as \*\* $p < 0.01$ .
