# Supplementary material for: Neutralization and Stability of SARS-CoV-2 Omicron Variant
Source: bioRxiv or medRxiv preprint supplement (doi:10.1101/2021.12.16.472934), 2021-12-20
Supplement: Supplementary file [file media-2.pdf]

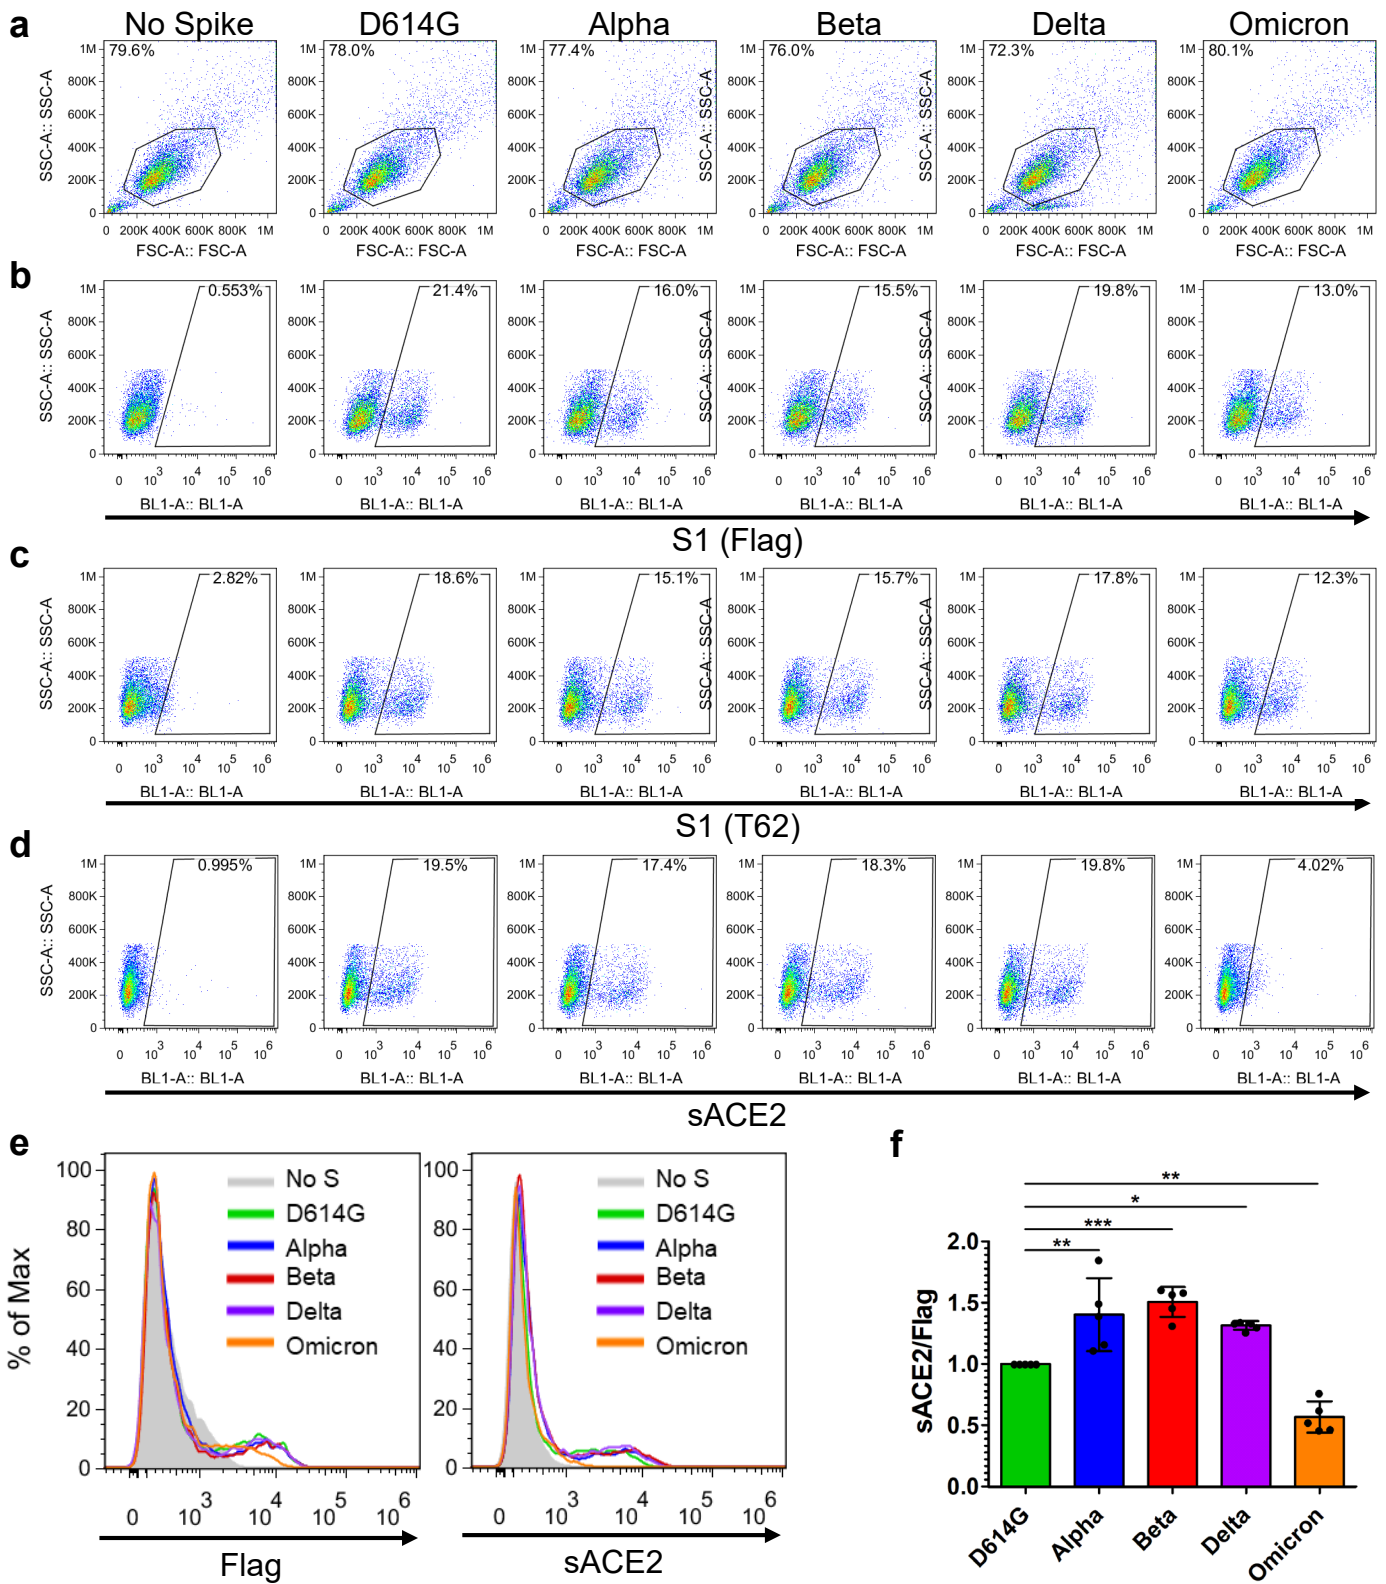

**Figure S2. Omicron spike surface expression and sACE2 binding:** (a-d) The gating strategy for one representative experiment is shown for determine the single cell population (a), the S1 positive population by N-terminal Flag tag (b), the S1 positive population by anti-S1 antibody (c), and the sACE2 positive population (d). (e) HEK293T cells were transfected with S expression constructs and stained for FACS with anti-Flag or soluble ACE2-Fc fusion protein (sACE2). (f) Mean fluorescence intensity for sACE2 signal was normalized with anti-Flag S1 signal to determine relative ACE2 binding.
