# Supplementary material for: Neutralization and Stability of SARS-CoV-2 Omicron Variant
Source: bioRxiv or medRxiv preprint supplement (doi:10.1101/2021.12.16.472934), 2021-12-20
Supplement: Supplementary file [file media-3.pdf]

**Table S1. Omicron spike trimer interface analysis by PDBePISA****a Overall interface comparison between Omicron and G614 S trimer**

|         | Protomer1 |       |                        | Protomer2 |       |                        | interface<br>area, Å <sup>2</sup> | ΔiG<br>kcal/mol | ΔiG<br>P-value | #HB | #SB |
|---------|-----------|-------|------------------------|-----------|-------|------------------------|-----------------------------------|-----------------|----------------|-----|-----|
|         | iNat      | iNres | Surface Å <sup>2</sup> | iNat      | iNres | Surface Å <sup>2</sup> |                                   |                 |                |     |     |
| Omicron | 660       | 188   | 59124                  | 714       | 191   | 58896                  | 6397.6                            | -60.4           | 0.092          | 56  | 14  |
| G614    | 623       | 176   | 56231                  | 670       | 181   | 56824                  | 6017.4                            | -59.6           | 0.056          | 46  | 10  |

Note:

iNat: the number of interfacing atoms.

iNres: the number of interfacing residues.

ΔiG: Solvation energy effect, kcal/mol

HB: Hydrogen bond

SB: Salt bridge

**b Unique hydrophilic interaction contributed by Omicron mutations**

| Protomer 1      | Hydrogen bonds |                 | Salt bridges    |                 |
|-----------------|----------------|-----------------|-----------------|-----------------|
|                 | Dist. [Å]      | Protomer 2      | Protomer 1      | Protomer 2      |
| A:ASN 317[ OD1] | 3.79           | B:LYS 764[ NZ ] | A:ASP 568[ OD2] | B:LYS 856[ NZ ] |
| A:ASP 568[ OD2] | 2.80           | B:LYS 856[ NZ ] |                 |                 |
| A:THR 572[ OG1] | 2.79           | B:LYS 856[ NZ ] |                 |                 |

**c Individual interface contact contributed by Omicron mutations**

|           | HSDC | ASA    | BSA   | ΔiG   |
|-----------|------|--------|-------|-------|
| A:ASN 417 |      | 55.99  | 8.14  | -0.12 |
| A:LYS 547 |      | 117.56 | 65.99 | 0.31  |
| A:GLY 614 | H    | 75.10  | 57.25 | 0.04  |
| A:LYS 969 | H    | 95.26  | 26.12 | 0.29  |
| B:LYS 764 | H    | 77.78  | 11.22 | -0.41 |
| B:TYR 796 | H    | 192.06 | 50.52 | 0.24  |
| B:PHE 981 |      | 124.99 | 44.63 | 0.41  |

ASA: Accessible Surface Area, Å<sup>2</sup>

BSA: Buried Surface Area, Å<sup>2</sup>

ΔiG: Solvation energy effect, kcal/mol

|||: Buried area percentage, one bar per 10%
